# Supplementary material for: The C. elegans homolog of human panic-disorder risk gene TMEM132D orchestrates neuronal morphogenesis through the WAVE-regulatory complex
Source: PubMed Central journal article supplement (PMC7962252; doi:10.1186/s13041-021-00767-w), 2021-03-16

a

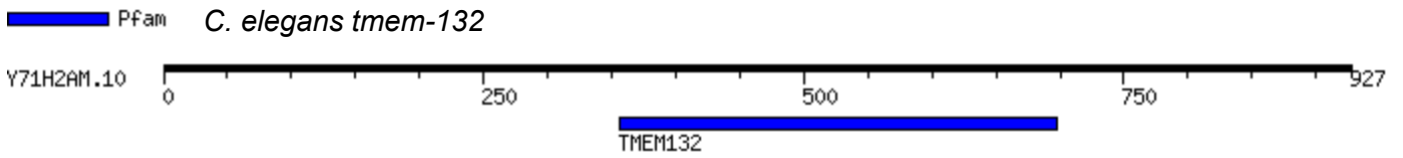

Pfam (1 motif)

| Pfam    | Position(Independent E-value)          | Description                               |
|---------|----------------------------------------|-------------------------------------------|
| TMEM132 | 356..698(2e-85) <a href="#">Detail</a> | PF16070, Transmembrane protein family 132 |

b

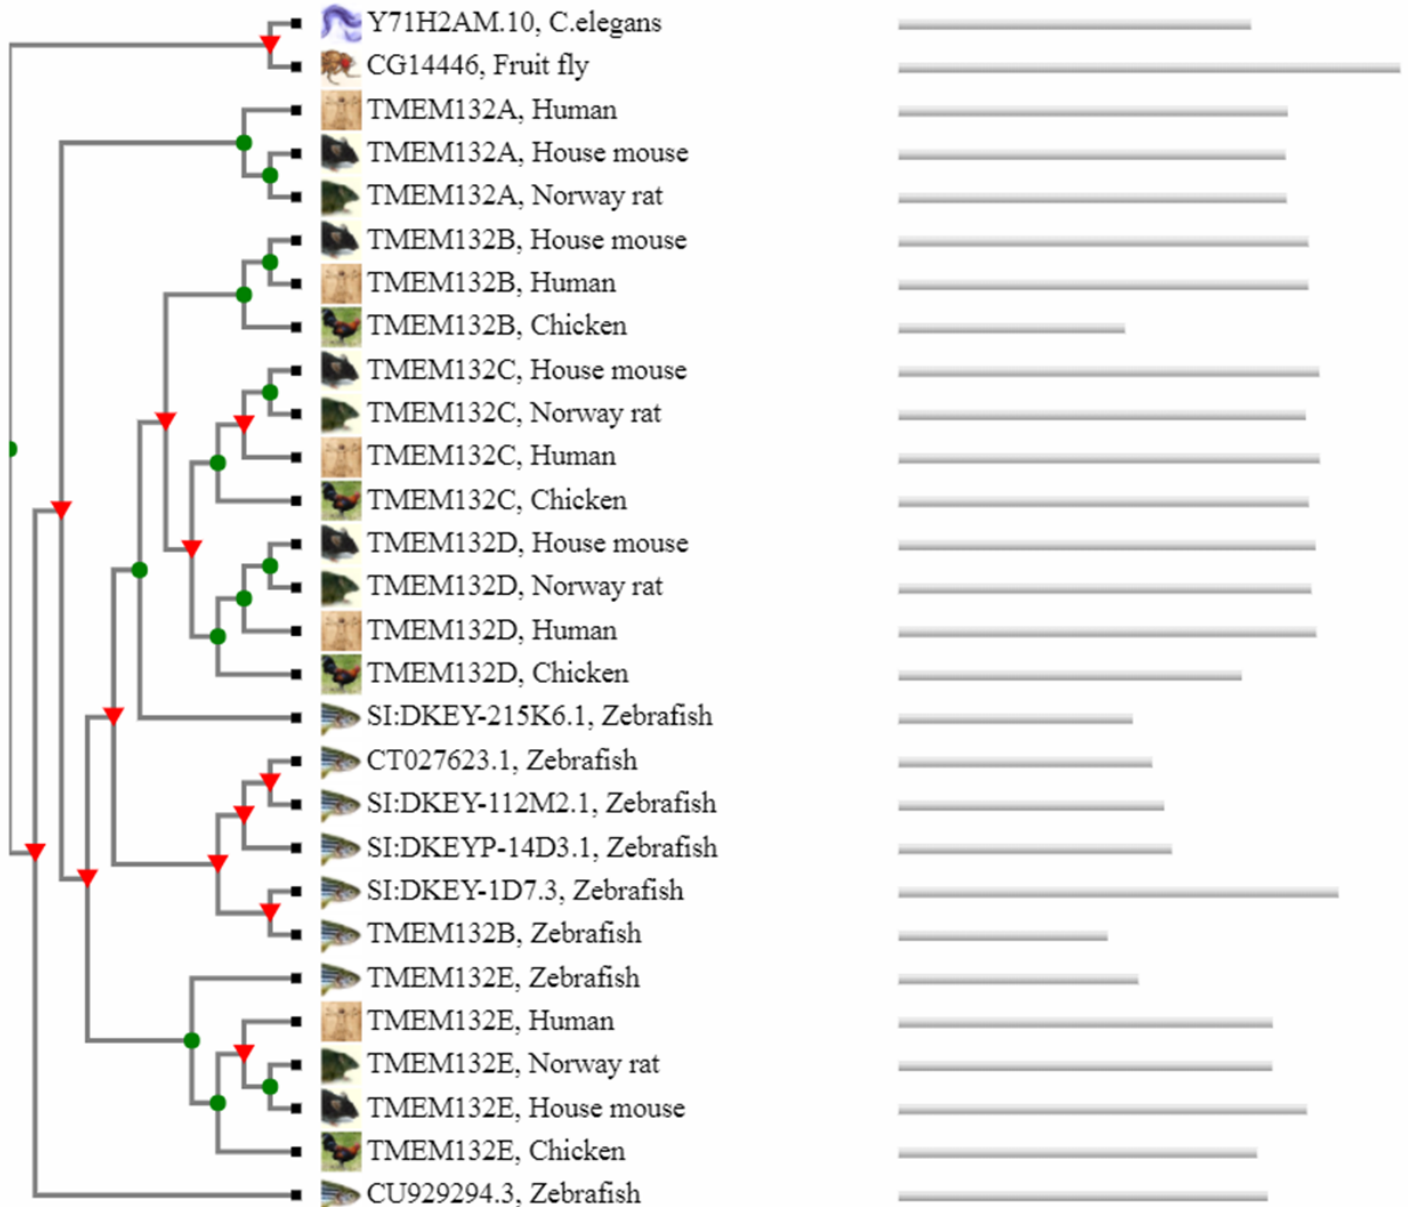

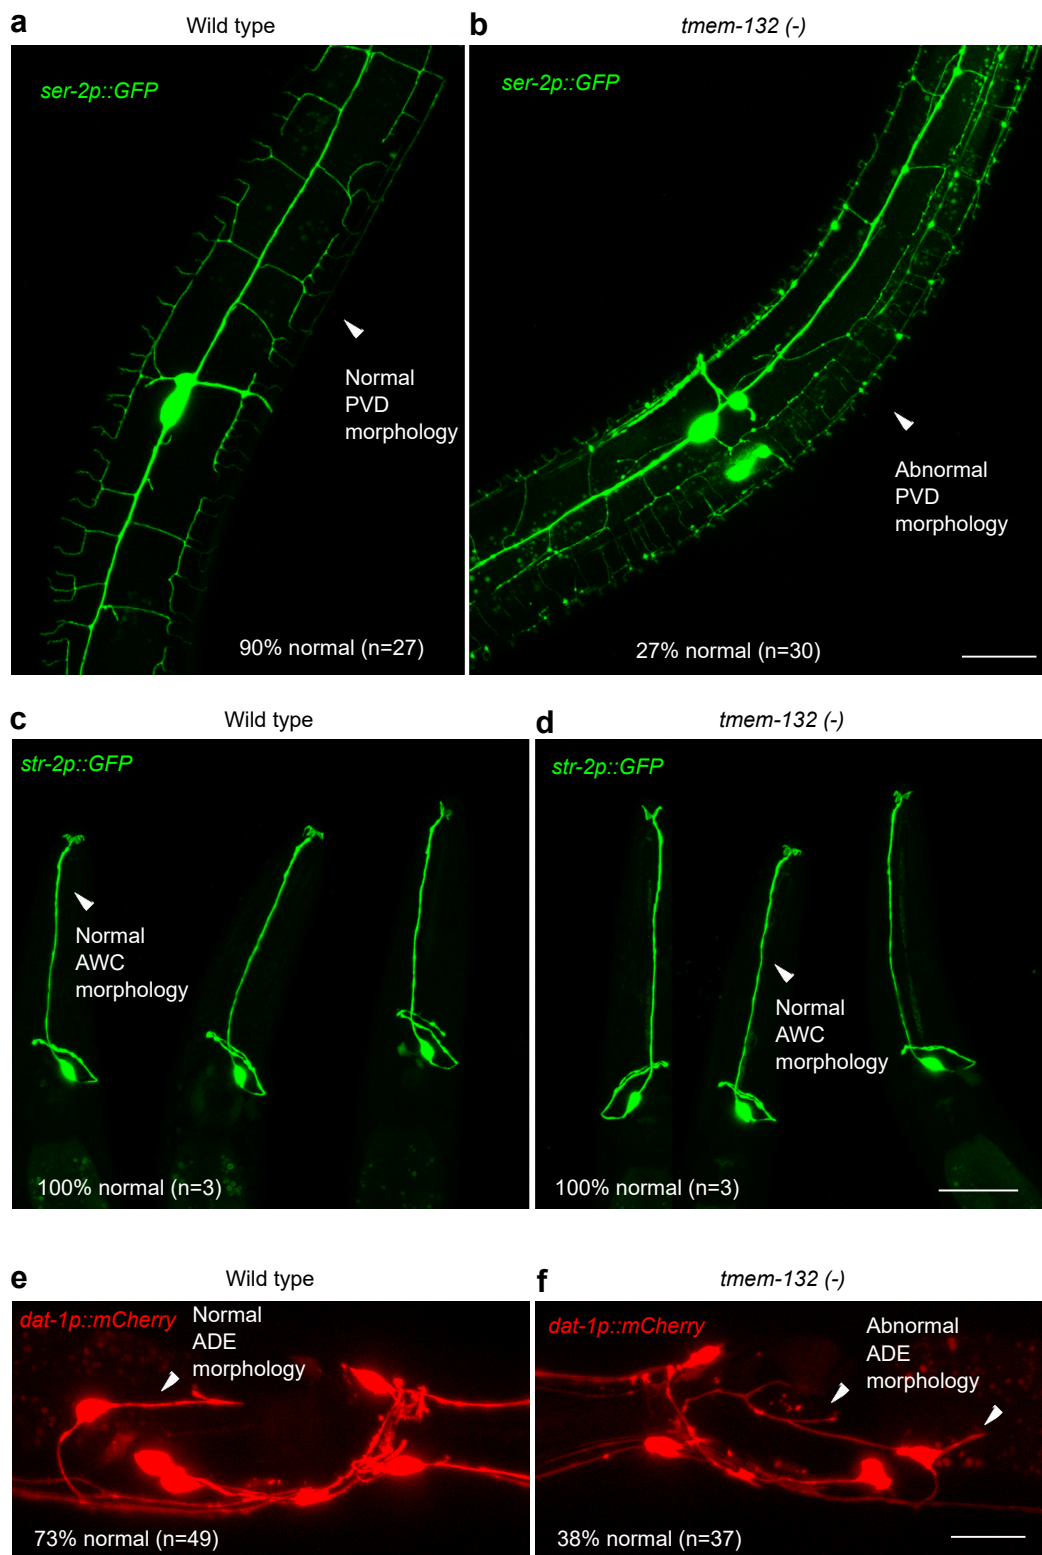

Fig. S3

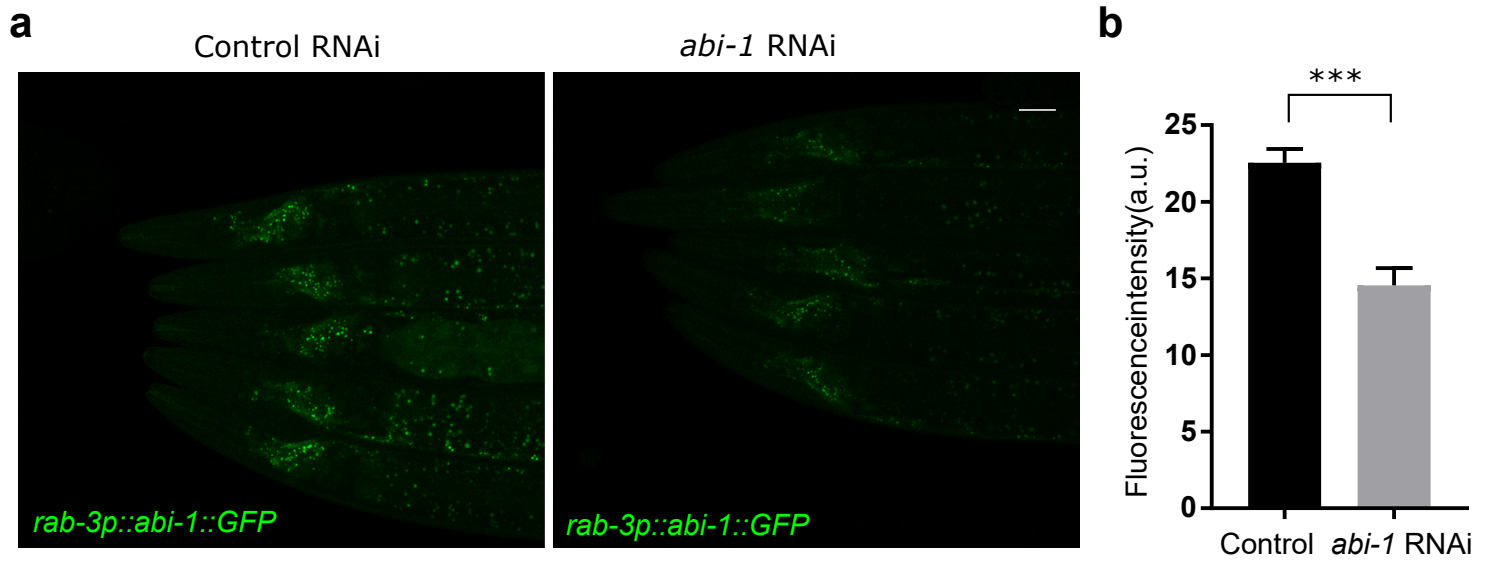

**a**

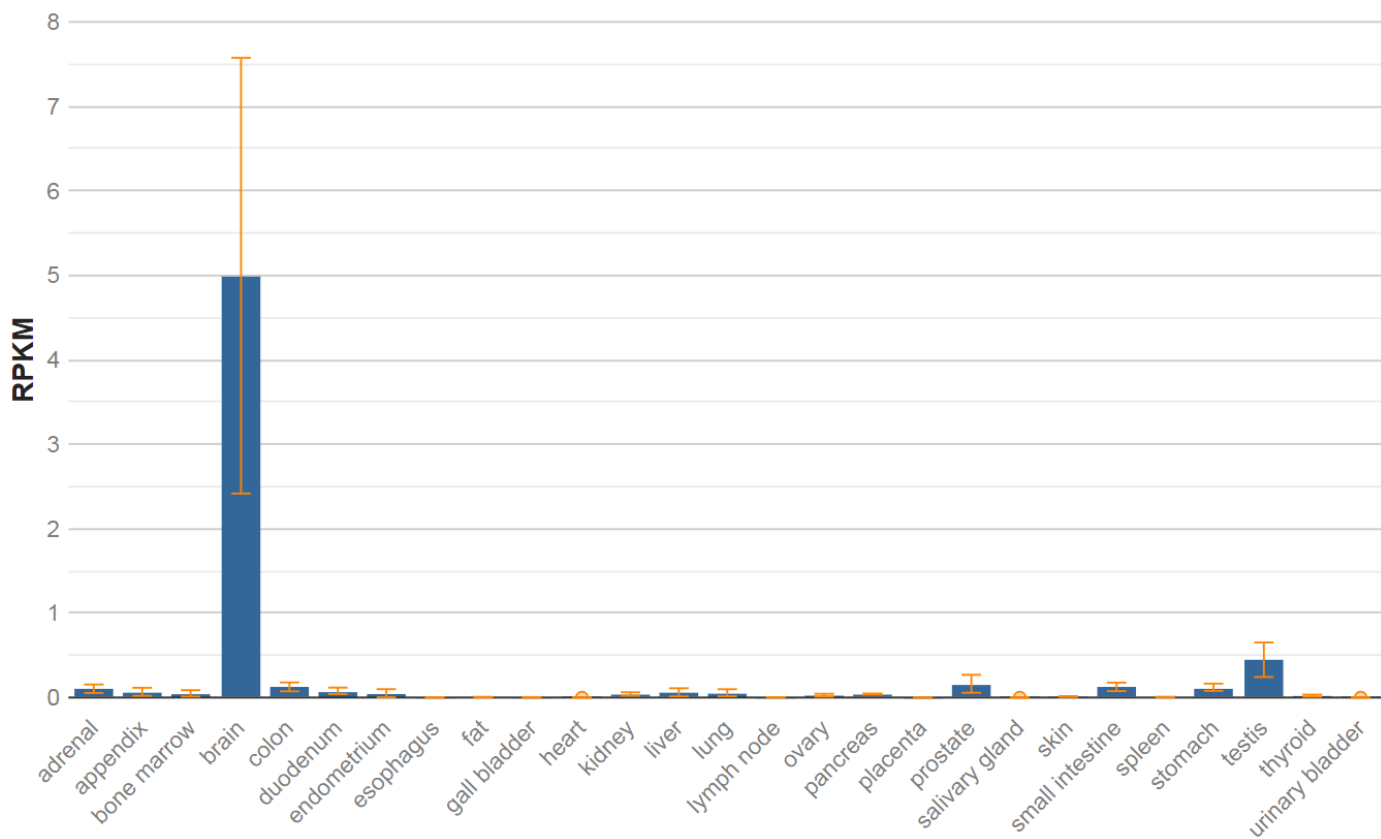

**b**

**Clusters With Highest Expression of Tmem132d**

Tmem132d - transmembrane protein 132D

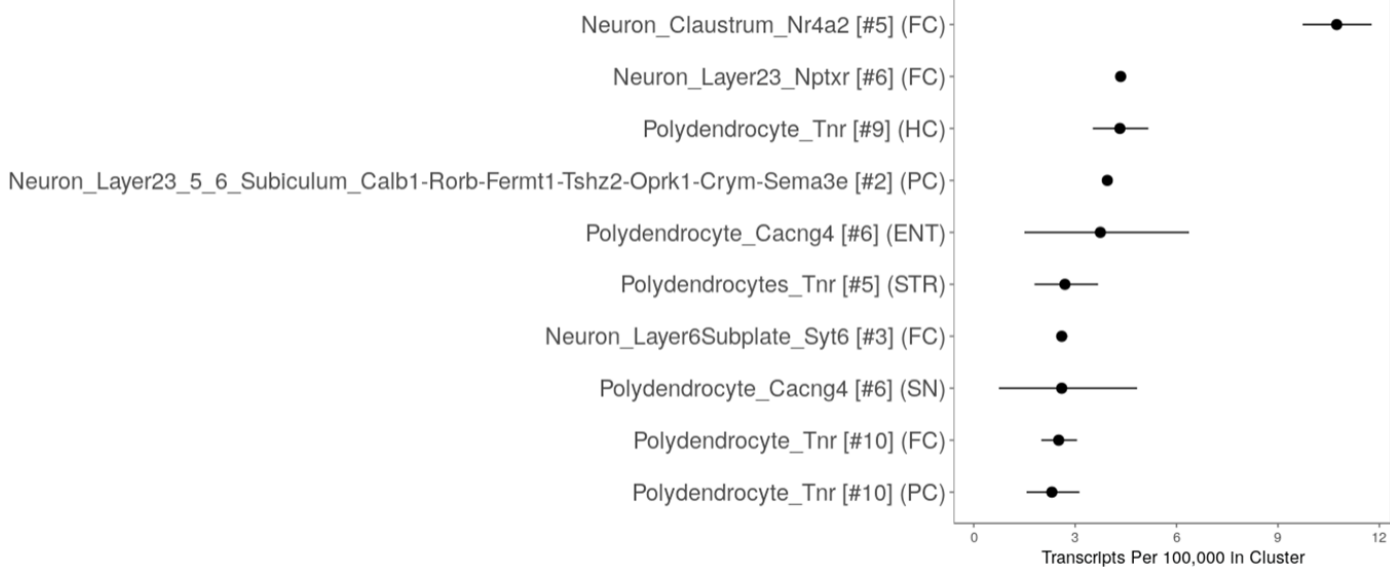

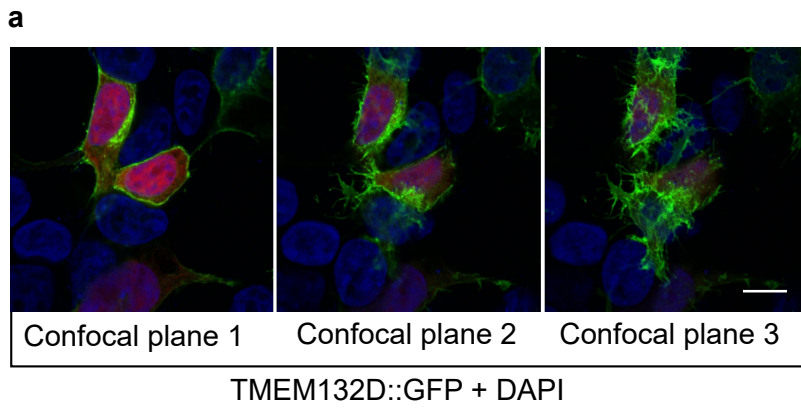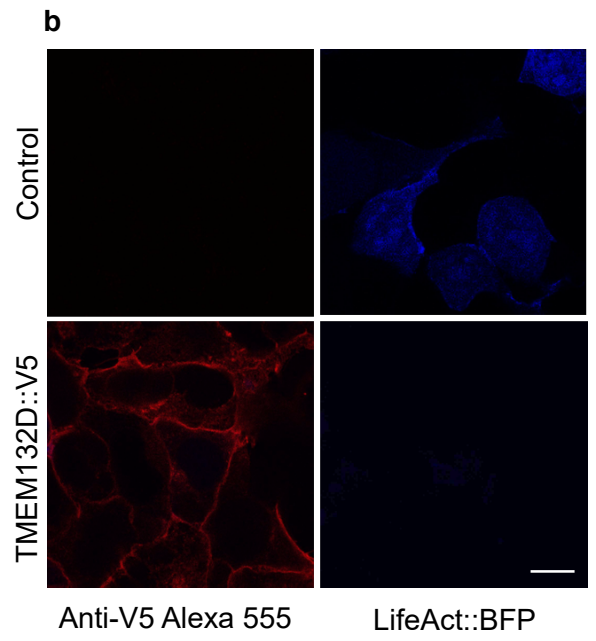

Supplement: 13041_2021_767_MOESM1_ESM.pdf [file 13041_2021_767_MOESM1_ESM.pdf]
