# Supplementary material for: The C. elegans homolog of human panic-disorder risk gene TMEM132D orchestrates neuronal morphogenesis through the WAVE-regulatory complex
Source: PubMed Central journal article supplement (PMC7962252; doi:10.1186/s13041-021-00767-w), 2021-03-16
Supplement: 13041_2021_767_MOESM2_ESM.pdf [file 13041_2021_767_MOESM2_ESM.pdf]

**Supplementary Table 1. List of genes encoding putative TMEM132D interactors identified from yeast-two-hybrid screens.**

| <u>Gene Name</u>     | <u>Occurrence frequency</u> | <u>Gene Name</u>     | <u>Occurrence frequency</u> |
|----------------------|-----------------------------|----------------------|-----------------------------|
| <i>NCKAP1</i>        | 3                           | <i>HDAC2</i>         | 1                           |
| <i>RNF2</i>          | 1                           | <i>TNFAIP8</i>       | 1                           |
| <i>HDAC2</i>         | 1                           | <i>SDHB</i>          | 1                           |
| <i>NDUFS5</i>        | 1                           | <i>PCLO</i>          | 2                           |
| <i>PLSCR2</i>        | 2                           | <i>PNISR</i>         | 2                           |
| <i>STK39</i>         | 1                           | <i>ATP7A</i>         | 1                           |
| <i>HOXA9</i>         | 1                           | <i>FAM35A</i>        | 1                           |
| <i>TMED7-TICAM2</i>  | 2                           | <i>PTPN2</i>         | 1                           |
| <i>PTPRD</i>         | 1                           | <i>RAB6A</i>         | 3                           |
| <i>CD59</i>          | 2                           | <i>ANKRD31</i>       | 1                           |
| <i>NM_005746.2</i>   | 1                           | <i>PGM1</i>          | 1                           |
| <i>ANKRD36</i>       | 2                           | <i>SEC22B</i>        | 1                           |
| <i>PNISR</i>         | 2                           | <i>TUBGCP5</i>       | 3                           |
| <i>CMPK1</i>         | 1                           | <i>HEBP2</i>         | 2                           |
| <i>UMOD</i>          | 1                           | <i>SLC35E2</i>       | 1                           |
| <i>TPST1</i>         | 1                           | <i>HNRNPUL1</i>      | 1                           |
| <i>TMED5</i>         | 2                           | <i>ZNF302</i>        | 2                           |
| <i>SRSF5</i>         | 1                           | <i>TOB2</i>          | 1                           |
| <i>IDI2-AS1</i>      | 1                           | <i>COMMD1</i>        | 2                           |
| <i>ENOPH1</i>        | 6                           | <i>LNX1</i>          | 1                           |
| <i>H3K27Ac</i>       | 1                           | <i>TRAPPC8</i>       | 1                           |
| <i>EFEMP1</i>        | 2                           | <i>TCF12</i>         | 1                           |
| <i>VPS13C</i>        | 1                           | <i>PAIP1</i>         | 1                           |
| <i>BNIP3L</i>        | 1                           | <i>CNGB3</i>         | 1                           |
| <i>PRPF40A</i>       | 9                           | <i>GFM2</i>          | 1                           |
| <i>COX11</i>         | 1                           | <i>MIR181A1HG</i>    | 1                           |
| <i>USP32P2</i>       | 2                           | <i>NAMPT</i>         | 1                           |
| <i>FMO2</i>          | 1                           | <i>MME</i>           | 1                           |
| <i>RNF2</i>          | 1                           | <i>ZBTB20</i>        | 2                           |
| <i>SEP_15</i>        | 2                           | <i>RCBTB2</i>        | 1                           |
| <i>USP32P2</i>       | 3                           | <i>ATP1B1</i>        | 1                           |
| <i>CNTN1</i>         | 2                           | <i>SVIL</i>          | 1                           |
| <i>TRAPPC11</i>      | 3                           | <i>CTD-2303H24.2</i> | 1                           |
| <i>CTD-2175A23.1</i> | 2                           | <i>UBA5</i>          | 1                           |
| <i>IL13RA1</i>       | 1                           | <i>CADPS2</i>        | 1                           |
| <i>PCCA</i>          | 2                           | <i>CPD</i>           | 1                           |
| <i>NPAS3</i>         | 1                           | <i>CCDC85A</i>       | 1                           |
| <i>PRMT3</i>         | 1                           | <i>SAMD12</i>        | 1                           |
